# Supplementary material for: Transcriptome analysis of Chinese mitten crabs (Eriocheir sinensis) gills in response to ammonia stress
Source: PeerJ. 2024 Jan 16;12:e16786. doi: 10.7717/peerj.16786 (PMC10798153; doi:10.7717/peerj.16786)
Supplement: Supplemental Information 6 [file peerj-12-16786-s006.xls]

## Sheet: CTSB
AG	β-actin	CTSB	△CT	—△△CT
	19.2813	30.1197	10.8384
	18.8438	30.0185	11.1748
	18.5875	29.7723	11.1848
CG					AVG	STD
	17.9374	30.4526	12.5153	1.67683	1.36829	0.287292
	18.3487	30.632	12.2833	1.10848
	18.5934	31.0977	12.5043	1.31954

## Sheet: ALOX5
AG	β-actin	ALOX5	△CT	—△△CT
	19.2813	30.9214	11.6401
	18.8438	30.7937	11.95
	18.5875	30.5046	11.9171
CG					AVG	STD
	17.9374	30.2406	12.3032	0.66313	0.284672	0.359667
	18.3487	30.246	11.8973	-0.0526695
	18.5934	30.754	12.1606	0.243557

## Sheet: NRD1
AG	β-actin	NRD1	△CT	—△△CT
	19.2813	32.9901	13.7088
	18.8438	33.5891	14.7453
	18.5875	33.6269	15.0394
CG					AVG	STD
	17.9374	32.1245	14.1871	0.478294	0.299278	0.168293
	18.3487	33.2383	14.8896	0.144291
	18.5934	33.908	15.3146	0.275248

## Sheet: SLC5A8
AG	β-actin	SLC5A8	△CT	—△△CT
	19.2813	32.459	13.1777
	18.8438	32.0832	13.2395
	18.5875	31.8513	13.2638
CG					AVG	STD
	17.9374	30.6048	12.6674	-0.510288	-0.777434	0.235095
	18.3487	30.7189	12.3702	-0.86924
	18.5934	30.9044	12.311	-0.952774

## Sheet: PIK3CA
AG	β-actin	PIK3CA	△CT	—△△CT
	19.2813	33.4718	14.1905
	18.8438	32.863	14.0192
	18.5875	32.3708	13.7833
CG					AVG	STD
	17.9374	30.3955	12.4581	-1.73242	-2.58627	0.831236
	18.3487	28.9751	10.6264	-3.39288
	18.5934	29.7432	11.1498	-2.6335
